# Supplementary material
Source: publisher figshare collection journal article supplement (https://acs.figshare.com/ndownloader/files/4569736)
Supplement: Supplementary file 1 [file 4569736]

## Supporting Information

### Synthesis and Evaluation of $^{18}\text{F}$ -Labeled 2-Phenylbenzothiazoles as Positron Emission Tomography Imaging Agents for Amyloid Plaques in Alzheimer's Disease

*Kim Serdons<sup>\*</sup>, Christelle Terwinghe, Peter Vermaelen, Koen Van Laere, Hank F. Kung, Luc Mortelmans, Guy Bormans and Alfons Verbruggen*

#### Contents:

1. Experimental details for compound **1b**, **1c**, **1d**, **2b**, **2c**, **2d**, **3c**, **3d**, **3e**, **3f** and **3h**
2. Quality control HPLC chromatograms of [ $^{18}\text{F}$ ]**5**
3. Purity of key target compounds together with HPLC chromatograms
4.  $^1\text{H}$ -NMR spectra of key target compounds
5. MS spectra of key target compounds

## 1. Experimental details for compound **1b**, **1c**, **1d**, **2b**, **2c**, **2d**, **3c**, **3d**, **3e**, **3f** and **3h**

**N-3',5'-dimethoxyphenyl-4-fluorobenzamide (1b).** **1b** was synthesized following method A starting from 3,5-dimethoxyaniline (12.26 g, 0.080 mol) and 4-fluorobenzoyl chloride (12.68 g, 0.080 mol) in pyridine (60 ml). This yielded 20.83 g of **1b** as a white solid (0.076 mol, 95%). <sup>1</sup>H-NMR (DMSO-*d*<sub>6</sub>, 200 MHz): δ 3.74 (s, 6H, 2CH<sub>3</sub>O), δ 6.27 (s, 1H, 4'-H), δ 7.08 (d, 2H, <sup>4</sup>*J* = 1.8 Hz, 2'-H 6'-H), δ 7.37 (t, 2H, <sup>3</sup>*J* = 8.6 Hz, 3-H 5-H), δ 8.02 (dd, 2H, <sup>3</sup>*J* = 8.4 Hz, <sup>4</sup>*J* = 3.2 Hz, 2-H 6-H), δ 10.18 (s, 1H, NH-CO). Accurate MS ES<sup>+</sup> *m/z* [M+H]<sup>+</sup> 276.1030 (calculated for C<sub>15</sub>H<sub>14</sub>NO<sub>3</sub>F 276.1031). Mp: 116.4 – 117.0 °C.

**N-4'-methoxyphenyl-4-nitrobenzamide (1c).** **1c** was synthesized following method A starting from p-anisidine (12.32 g, 0.100 mol) and 4-nitrobenzoyl chloride (18.56 g, 0.100 mol) in pyridine (60 ml) and refluxing for 2 h. This yielded 15.21 g of **1c** as a green solid (0.056 mol, 56%). <sup>1</sup>H-NMR (DMSO-*d*<sub>6</sub>, 300 MHz): δ 3.76 (s, 3H, CH<sub>3</sub>O), δ 6.95 (d, 2H, <sup>3</sup>*J* = 8.9 Hz, 3'-H 5'-H), δ 7.68 (d, 2H, <sup>3</sup>*J* = 8.9 Hz, 2'-H 6'-H), δ 8.18 (d, 2H, <sup>3</sup>*J* = 8.7 Hz, 2-H 6-H), δ 8.36 (d, 2H, <sup>3</sup>*J* = 8.6 Hz, 3-H 5-H), δ 10.43 (s, 1H, NH-CO). Accurate MS ES<sup>+</sup> *m/z* [M+H]<sup>+</sup> 273.0869 (calculated for C<sub>14</sub>H<sub>12</sub>N<sub>2</sub>O<sub>4</sub> 273.0870). Mp: 193.2 – 194.3 °C.

**N-4'-methylphenyl-4-nitrobenzamide (1d).** **1d** was synthesized following method A starting from p-toluidine (10.72 g, 0.100 mol) and 4-nitrobenzoyl chloride (18.56 g, 0.100 mol) in pyridine (150 ml) and refluxing for 2 h. Crystallization from methanol yielded 22.18 g of **1d** as yellow needles (0.086 mol, 86%). <sup>1</sup>H-NMR (DMSO-*d*<sub>6</sub>, 200 MHz): δ 2.30 (s, 3H, CH<sub>3</sub>), δ 7.18 (d, 2H, <sup>3</sup>*J* = 8.4 Hz, 3'-H 5'-H), δ 7.67 (d, 2H, <sup>3</sup>*J* = 8.4 Hz, 2'-H 6'-H), δ 8.18 (d, 2H, <sup>3</sup>*J* = 8.8 Hz, 2-H 6-H), δ 8.37 (d, 2H, <sup>3</sup>*J* = 8.8 Hz, 3-H 5-H), δ 10.48 (s, 1H, NH-CO).

Accurate MS ES<sup>+</sup> m/z [M+H]<sup>+</sup> 257.0903 (calculated for C<sub>14</sub>H<sub>12</sub>N<sub>2</sub>O<sub>3</sub> 257.0921). Mp: 196.4 – 197.1 °C.

**N-3',5'-dimethoxyphenyl-4-fluorothiobenzamide (2b).** **2b** was synthesized following method B starting from **1b** (2.04 g, 0.0074 mol) and Lawesson's reagent (1.69 g, 0.0042 mol) in chlorobenzene (10 ml). After refluxing for 3 h, chlorobenzene was evaporated and the residue was purified with silica column chromatography using dichloromethane as eluent to yield 0.764 g of **2b** as a yellow solid (0.0026 mol, 37%). <sup>1</sup>H-NMR (DMSO-*d*<sub>6</sub>, 200 MHz): δ 3.75 (s, 6H, 2CH<sub>3</sub>O), δ 6.44 (s, 1H, 4'-H), δ 7.17 (d, 2H, <sup>4</sup>*J* = 1.8 Hz, 2'-H 6'-H), δ 7.29 (t, 2H, <sup>3</sup>*J* = 8.9 Hz, 3-H 5-H), δ 7.87 (dd, 2H, <sup>3</sup>*J* = 8.6 Hz, <sup>4</sup>*J* = 3.0 Hz, 2-H 6-H), δ 11.69 (s, 1H, NH-CS). Accurate MS ES<sup>+</sup> m/z [M+H]<sup>+</sup> 292.0790 (calculated for C<sub>15</sub>H<sub>14</sub>NO<sub>2</sub>FS 292.0802). Mp: 105.2 – 105.4 °C.

**N-4'-methoxyphenyl-4-nitrothiobenzamide (2c).** **2c** was synthesized following method B starting from **1c** (14.43 g, 0.053 mol) and Lawesson's reagent (12.94 g, 0.032 mol) in 1,4-dioxane (120 ml). Crystallization from methanol yielded 13.78 g of **2c** as brown crystals (0.048 mol, 91%). <sup>1</sup>H-NMR (DMSO-*d*<sub>6</sub>, 300 MHz): δ 3.78 (s, 3H, CH<sub>3</sub>O), δ 7.02 (d, 2H, <sup>3</sup>*J* = 8.9 Hz, 3'-H 5'-H), δ 7.77 (d, 2H, <sup>3</sup>*J* = 8.9 Hz, 2'-H 6'-H), δ 7.99 (d, 2H, <sup>3</sup>*J* = 8.7 Hz, 2-H 6-H), δ 8.30 (d, 2H, <sup>3</sup>*J* = 8.7 Hz, 3-H 5-H), δ 11.98 (s, 1H, NH-CS). Accurate MS ES<sup>+</sup> m/z [M+H]<sup>+</sup> 289.0652 (calculated for C<sub>14</sub>H<sub>12</sub>N<sub>2</sub>O<sub>3</sub>S 289.0641). Mp: 174.5 – 175.1 °C.

**N-4'-methylphenyl-4-nitrothiobenzamide (2d).** **2d** was synthesized following method B starting from **1d** (19.22 g, 0.075 mol) and Lawesson's reagent (18.20 g, 0.045 mol) in 1,4-

dioxane (120 ml). Crystallisation from methanol yielded 19.46 g of **2d** as yellow crystals (0.071 mol, 95%). <sup>1</sup>H-NMR (DMSO-*d*<sub>6</sub>, 200 MHz): δ 2.33 (s, 3H, CH<sub>3</sub>), δ 7.26 (d, 2H, <sup>3</sup>*J* = 8.4 Hz, 3'-H 5'-H), δ 7.76 (d, 2H, <sup>3</sup>*J* = 8.4 Hz, 2'-H 6'-H), δ 8.00 (d, 2H, <sup>3</sup>*J* = 8.8 Hz, 2-H 6-H), δ 8.30 (d, 2H, <sup>3</sup>*J* = 8.8 Hz, 3-H 5-H), δ 12.06 (s, 1H, NH-CS). Accurate MS ES<sup>+</sup> *m/z* [M+H]<sup>+</sup> 273.0683 (calculated for C<sub>14</sub>H<sub>12</sub>N<sub>2</sub>O<sub>2</sub>S 273.0692). Mp: 195.3 – 196.7 °C.

**5,7-Dimethoxy-2-(4'-fluorophenyl)-1,3-benzothiazole (3c).** **3c** was synthesized following method C starting from **2b** (0.583 g, 0.0020 mol) and potassium ferricyanide (5.27 g, 0.016 mol). The residue was purified with silica column chromatography using a mixture of dichloromethane and hexane (90:10 V/V) as eluent to yield 0.268 g of **3c** as a white solid (0.0009 mol, 45%). <sup>1</sup>H-NMR (CDCl<sub>3</sub>, 200 MHz): δ 3.90 (s, 3H, 5-CH<sub>3</sub>O), δ 3.96 (s, 3H, 7-CH<sub>3</sub>O), δ 6.50 (d, 1H, <sup>4</sup>*J* = 1.8 Hz, 6-H), δ 7.17 (t, 2H, <sup>3</sup>*J* = 8.7 Hz, 3'-H 5'-H), δ 7.18 (d, 1H, <sup>4</sup>*J* = 2.0 Hz, 4-H), δ 8.06 (dd, 2H, <sup>3</sup>*J* = 8.4 Hz, <sup>4</sup>*J* = 3.6 Hz, 2'-H 6'-H). Accurate MS ES<sup>+</sup> *m/z* [M+H]<sup>+</sup> 290.0625 (calculated for C<sub>15</sub>H<sub>12</sub>NO<sub>2</sub>FS 290.0645). Mp: 189.7 – 190.5 °C.

**5,7-Dihydroxy-2-(4'-fluorophenyl)-1,3-benzothiazole (3d).** **3d** was synthesized following method D starting from **3c** (0.50 g, 0.0017 mol), using 9.9 ml BBr<sub>3</sub> and stirring for 12 h. The residue was purified with silica column chromatography using gradient mixtures of hexane and ethylacetate (up to 30%) as eluent to yield 0.384 g of **3d** as a white solid (0.0015 mol, 88%). <sup>1</sup>H-NMR (DMSO-*d*<sub>6</sub>, 200 MHz): δ 6.45 (d, 1H, <sup>4</sup>*J* = 1.8 Hz, 6-H), δ 6.89 (d, 1H, <sup>4</sup>*J* = 1.8 Hz, 4-H), δ 7.38 (t, 2H, <sup>3</sup>*J* = 8.8 Hz, 3'-H 5'-H), δ 8.09 (dd, 2H, <sup>3</sup>*J* = 8.7 Hz, <sup>4</sup>*J* = 5.2 Hz, 2'-H 6'-H), δ 9.58 (s, 1H, 5-OH), δ 10.48 (s, 1H, 7-OH). Accurate MS ES<sup>+</sup> *m/z* [M+H]<sup>+</sup> 262.0330 (calculated for C<sub>13</sub>H<sub>8</sub>NO<sub>2</sub>FS 262.0333). Mp: 275.0 – 276.5 °C.

**6-Methoxy-2-(4'-nitrophenyl)-1,3-benzothiazole (3e).** **3e** was synthesized following method C starting from **2c** (12.97 g, 0.045 mol) and potassium ferricyanide (59.27 g, 0.180 mol). The residue was purified with silica column chromatography using dichloromethane as eluent to yield 3.92 g of **3e** as a yellow solid (0.014 mol, 31%). <sup>1</sup>H-NMR (CDCl<sub>3</sub>, 200 MHz): δ 3.92 (s, 3H, CH<sub>3</sub>O), δ 7.15 (dd, 1H, <sup>3</sup>J = 9.2 Hz, <sup>4</sup>J = 2.6 Hz, 5-H), δ 7.38 (d, 1H, <sup>4</sup>J = 2.6 Hz, 7-H), δ 8.00 (d, 1H, <sup>3</sup>J = 8.6 Hz, 4-H), δ 8.20 (dd, 2H, <sup>3</sup>J = 6.8 Hz, <sup>4</sup>J = 2.0 Hz, 2'-H 6'-H), δ 8.33 (dd, 2H, <sup>3</sup>J = 7.0 Hz, <sup>4</sup>J = 2.2 Hz, 3'-H 5'-H). Accurate MS ES<sup>+</sup> m/z [M+H]<sup>+</sup> 287.0488 (calculated for C<sub>14</sub>H<sub>10</sub>N<sub>2</sub>O<sub>3</sub>S 287.0485). Mp: 203.6 – 204.7 °C.

**6-Hydroxy-2-(4'-nitrophenyl)-1,3-benzothiazole (3f).** **3f** was synthesized following method D starting from **3e** (3.15 g, 0.011 mol) and using 0.025 mol BBr<sub>3</sub>. The reaction was stirred overnight and the residue was purified with silica column chromatography using dichloromethane as eluent to yield 1.83 g of **3f** as a yellow solid (0.0067 mol, 61%). <sup>1</sup>H-NMR (DMSO-*d*<sub>6</sub>, 200 MHz): δ 7.05 (dd, 1H, <sup>3</sup>J = 8.8 Hz, <sup>4</sup>J = 1.8 Hz, 5-H), δ 7.47 (d, 1H, <sup>4</sup>J = 2.6 Hz, 7-H), δ 7.93 (d, 1H, <sup>3</sup>J = 9.0 Hz, 4-H), δ 8.24 (d, 2H, <sup>3</sup>J = 8.8 Hz, 2'-H 6'-H), δ 8.36 (d, 2H, <sup>3</sup>J = 8.8 Hz, 3'-H 5'-H), δ 10.10 (s, 1H, 6-OH). Accurate MS ES<sup>+</sup> m/z [M+H]<sup>+</sup> 273.0350 (calculated for C<sub>13</sub>H<sub>8</sub>N<sub>2</sub>O<sub>3</sub>S 273.0328). Mp: 253.4 – 254.2 °C.

**6-Methyl-2-(4'-nitrophenyl)-1,3-benzothiazole (3h).** **3h** was synthesized following method C starting from **2d** (16.34 g, 0.060 mol) and potassium ferricyanide (65.85 g, 0.200 mol). Crystallisation from ethyl acetate yielded 9.47 g of **3h** as yellow crystals (0.035 mol, 58%). <sup>1</sup>H-NMR (CDCl<sub>3</sub>, 300 MHz): δ 2.53 (s, 3H, CH<sub>3</sub>), δ 7.36 (d, 2H, <sup>3</sup>J = 5.6 Hz, 3'-H 5'-H), δ 7.74 (s, 1H, 5-H), δ 8.00 (d, 1H, <sup>3</sup>J = 5.6 Hz, 7-H), δ 8.24 (d, 2H, <sup>3</sup>J = 9.0 Hz, 4-H), δ 8.34 (d,

2H,  $^3J = 8.9$  Hz, 2'-H 6'-H). Accurate MS ES<sup>+</sup> m/z [M+H]<sup>+</sup> 271.0537 (calculated for C<sub>14</sub>H<sub>10</sub>N<sub>2</sub>O<sub>2</sub>S 271.0536). Mp: 212.9 – 214.6 °C.

## 2. Quality control HPLC chromatograms of [ $^{18}\text{F}$ ]**5**

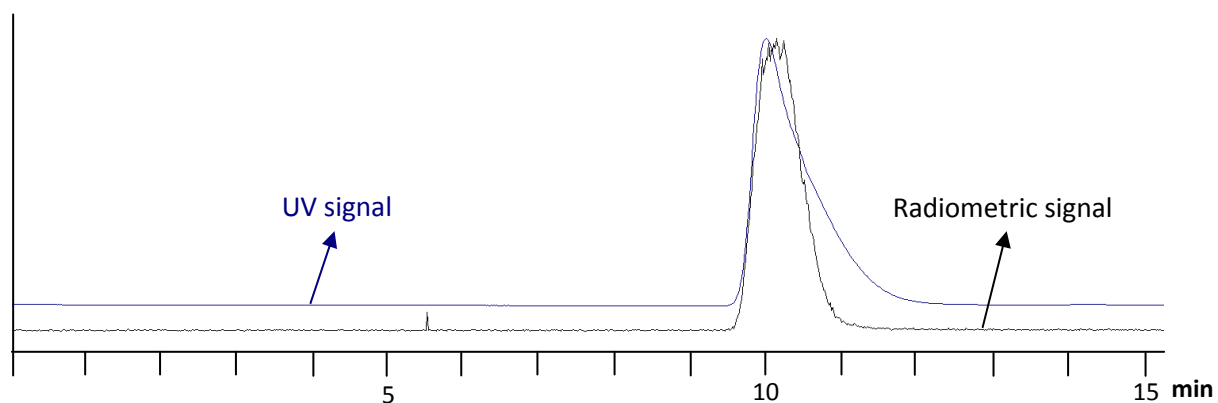

Quality control HPLC chromatograms of [ $^{18}\text{F}$ ]**5** coinjected with authentic non-radioactive **5**. Stationary phase: XTerra RP C18 (3.5  $\mu\text{m}$ , 3.0 mm x 100 mm); Mobile phase: 0.05 M ammonium acetate and ethanol/THF (75:25) (45:55 V/V); Flow rate: 0.3 ml/min; Detection: UV 234 nm.

### 3. Purity of key target compounds together with HPLC chromatograms

#### HPLC method:

*Stationary phase:* XTerra™ RP C<sub>18</sub> column (5 µm, 4.6 mm x 250 mm; Waters)

*Mobile phase:*

METHOD 1:

|               | NH <sub>4</sub> OAc 0.05 M | Acetonitrile |
|---------------|----------------------------|--------------|
| <b>0 min</b>  | 95                         | 5            |
| <b>20 min</b> | 5                          | 95           |
| <b>25 min</b> | 5                          | 95           |
| <b>30 min</b> | 95                         | 5            |

METHOD 2: 50% NH<sub>4</sub>OAc 0.05M and 50% EtOH/THF (75/25)

*Flow rate:* 1 mL/min

*UV-wavelength:* 254 nm

| Compound  | Method | Retention time (RT, min) | Purity (%) |
|-----------|--------|--------------------------|------------|
| <b>3a</b> | 2      | 20.63                    | 98.66      |
| <b>3b</b> | 1      | 20.82                    | 99.36      |
| <b>3d</b> | 1      | 18.00                    | 96.83      |
| <b>3e</b> | 2      | 25.20                    | 97.56      |
| <b>3g</b> | 1      | 22.67                    | 98.51      |
| <b>3h</b> | 1      | 23.88                    | 96.69      |
| <b>5</b>  | 1      | 24.25                    | 98.03      |
| <b>8</b>  | 1      | 16.37                    | 96.38      |



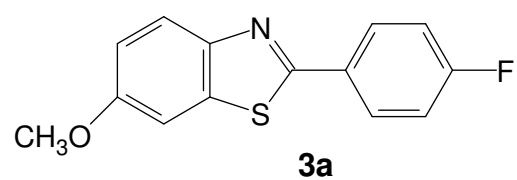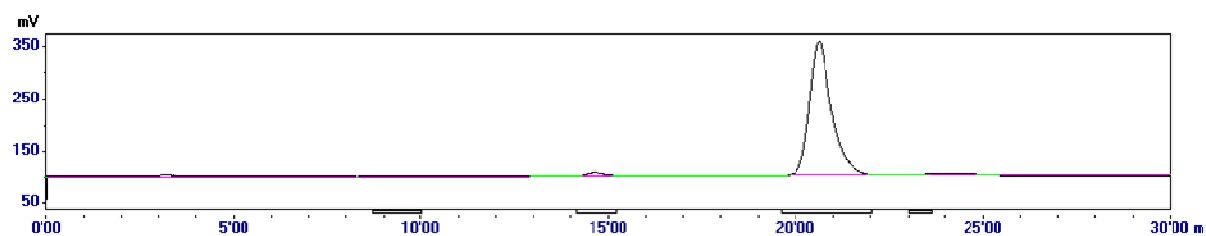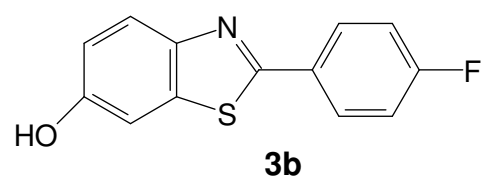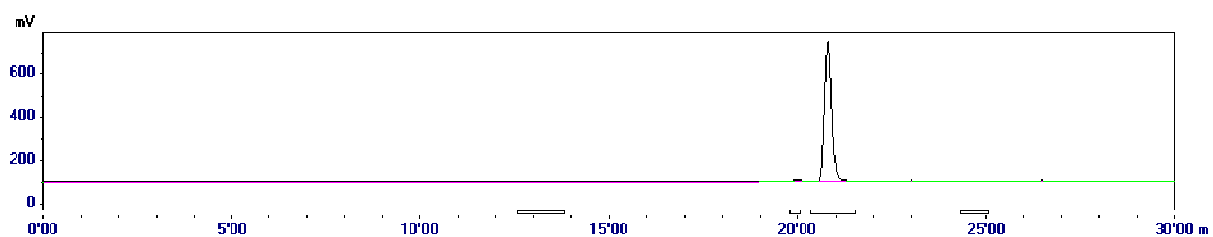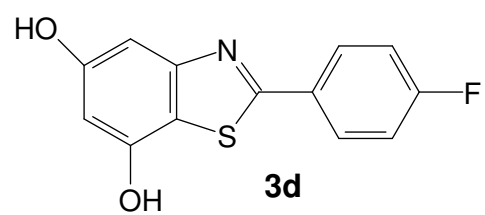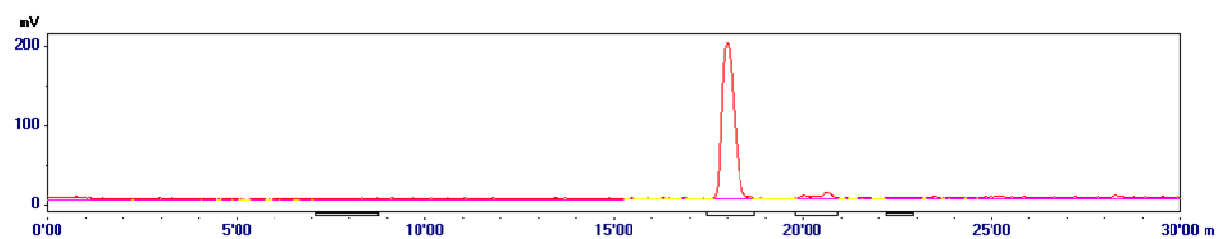

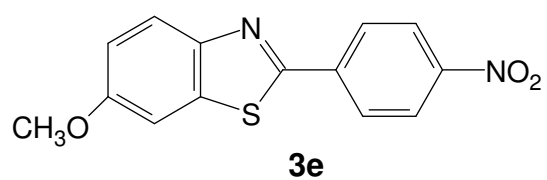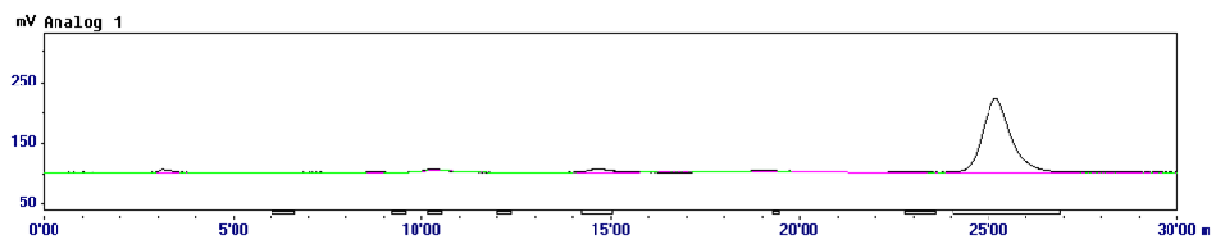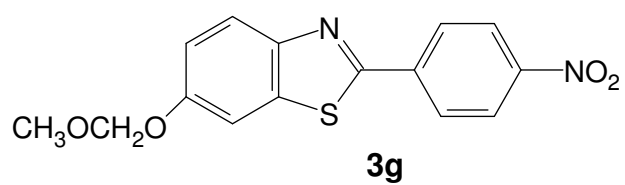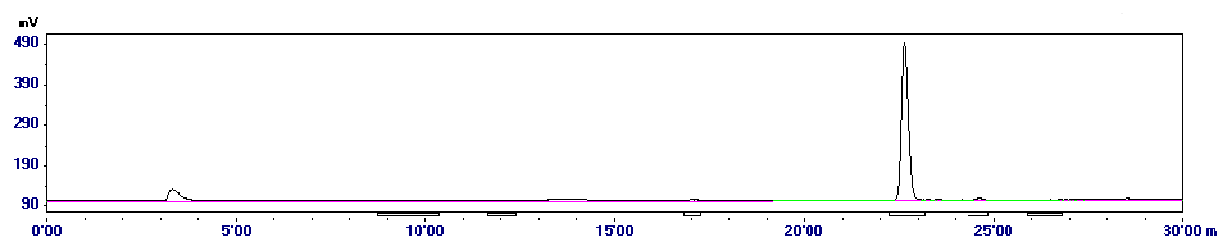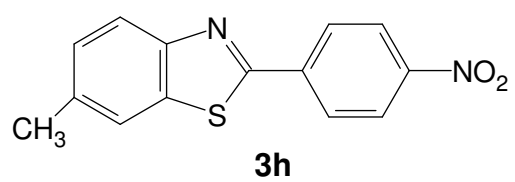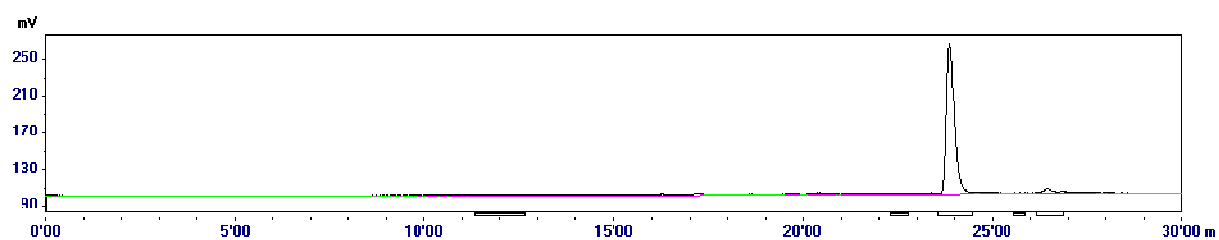

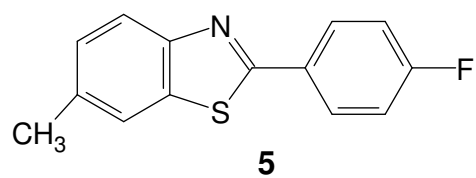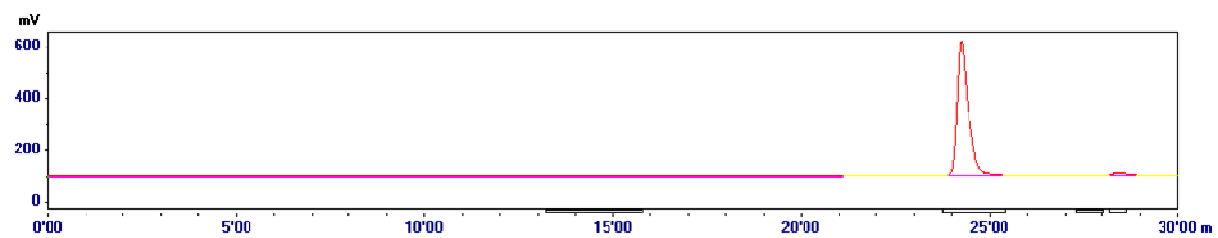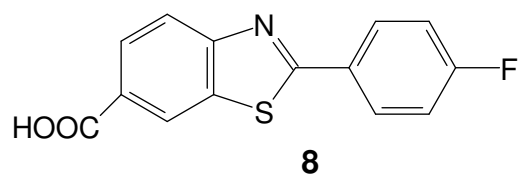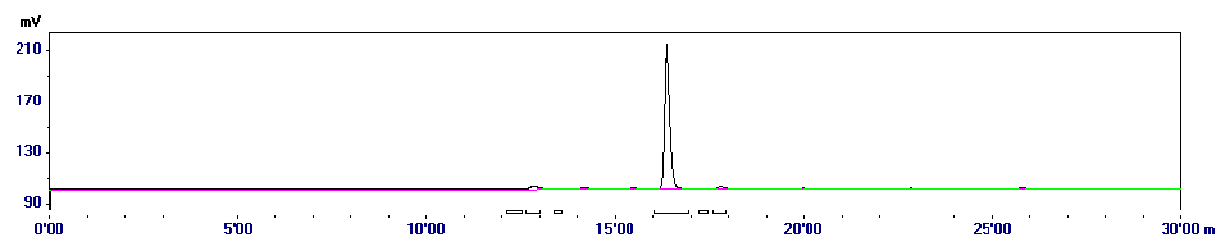

#### 4. <sup>1</sup>H-NMR spectra of key target compounds

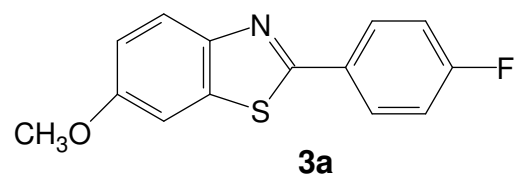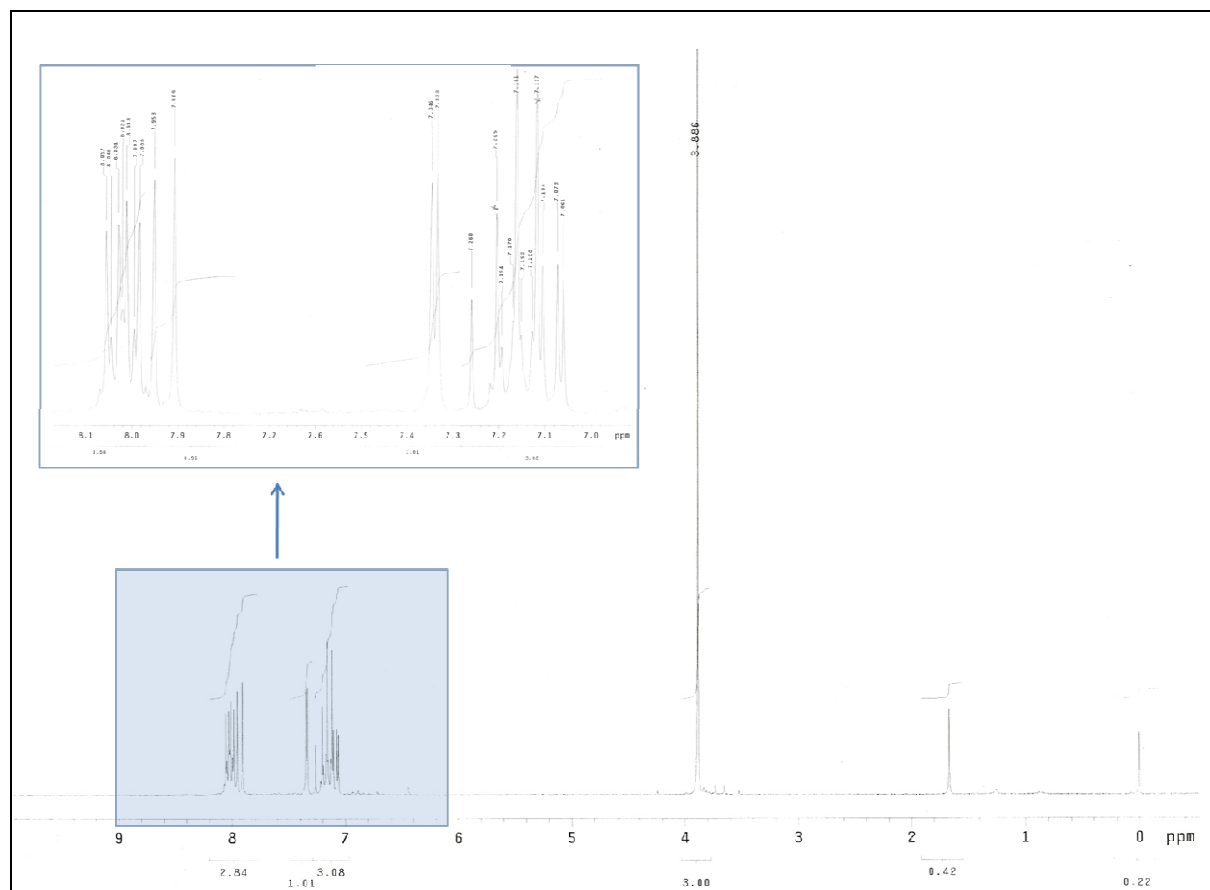

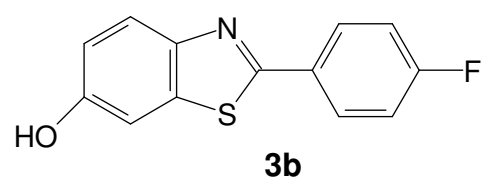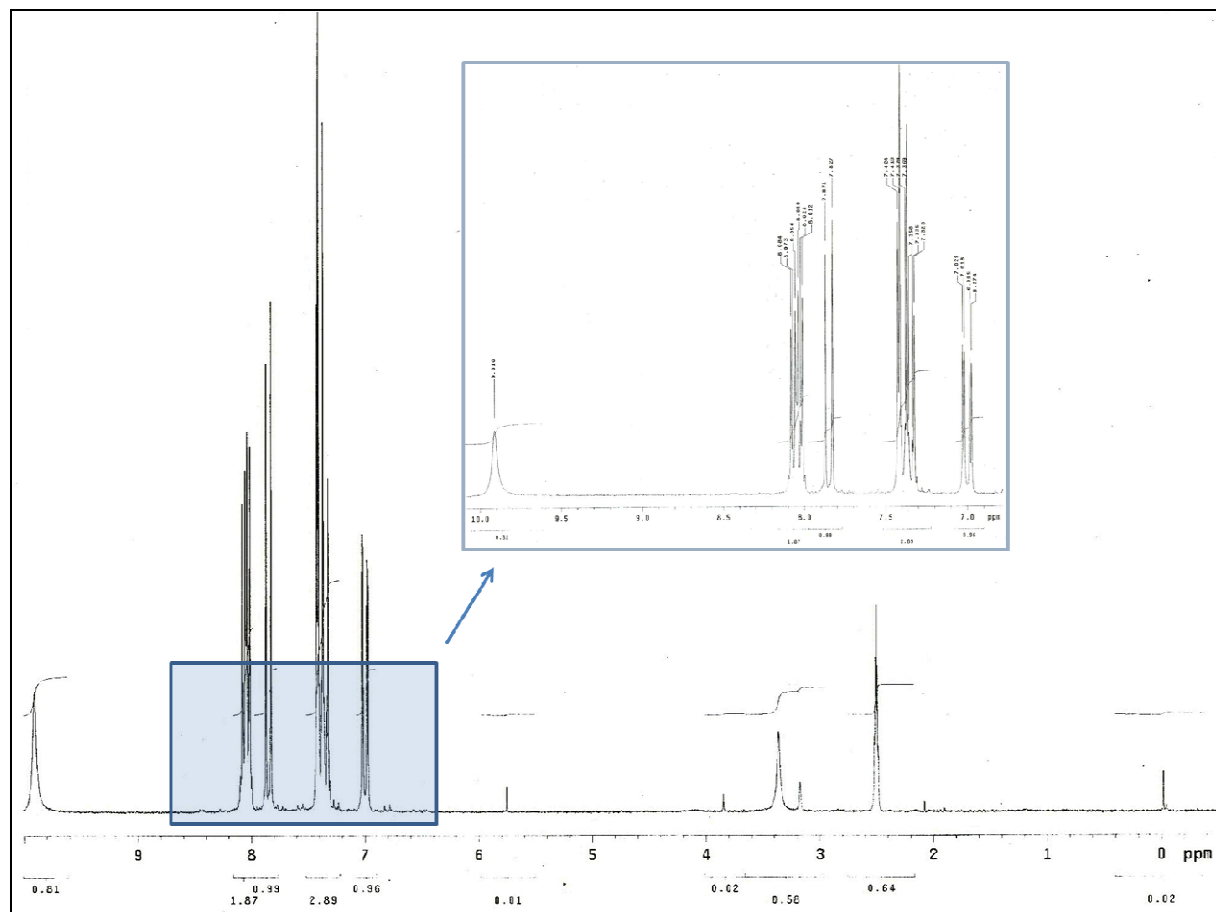

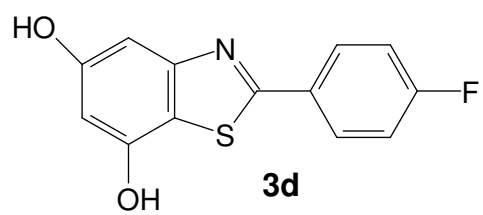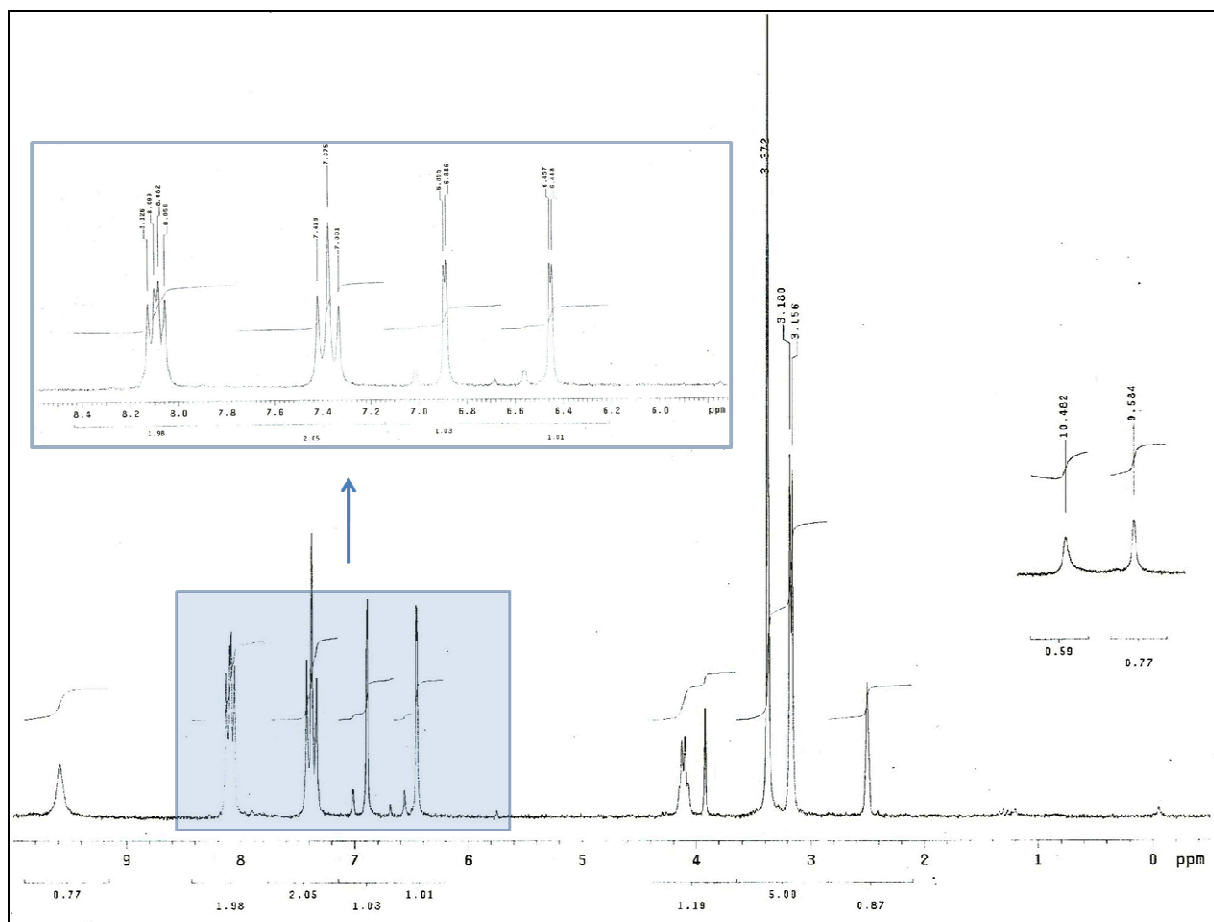

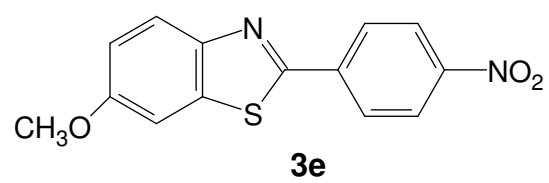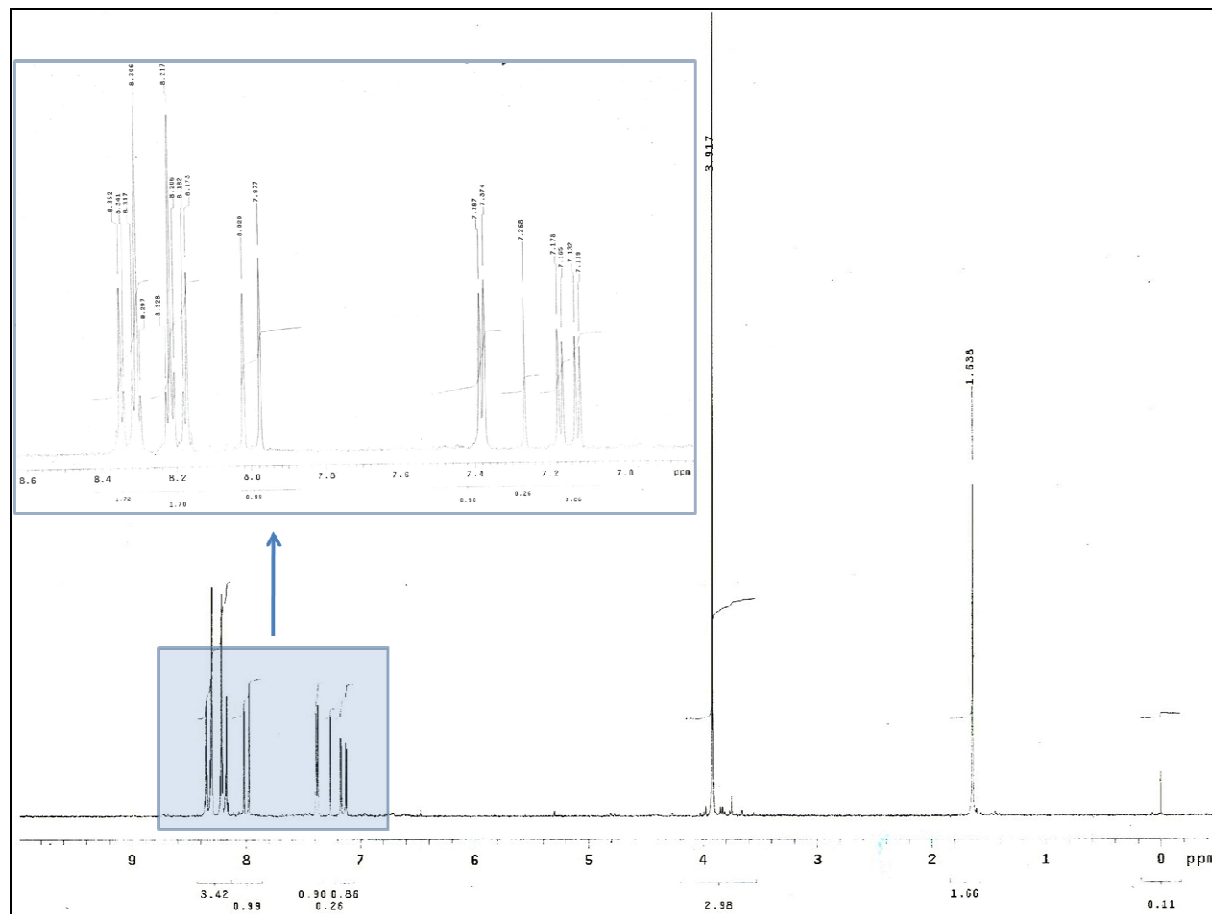

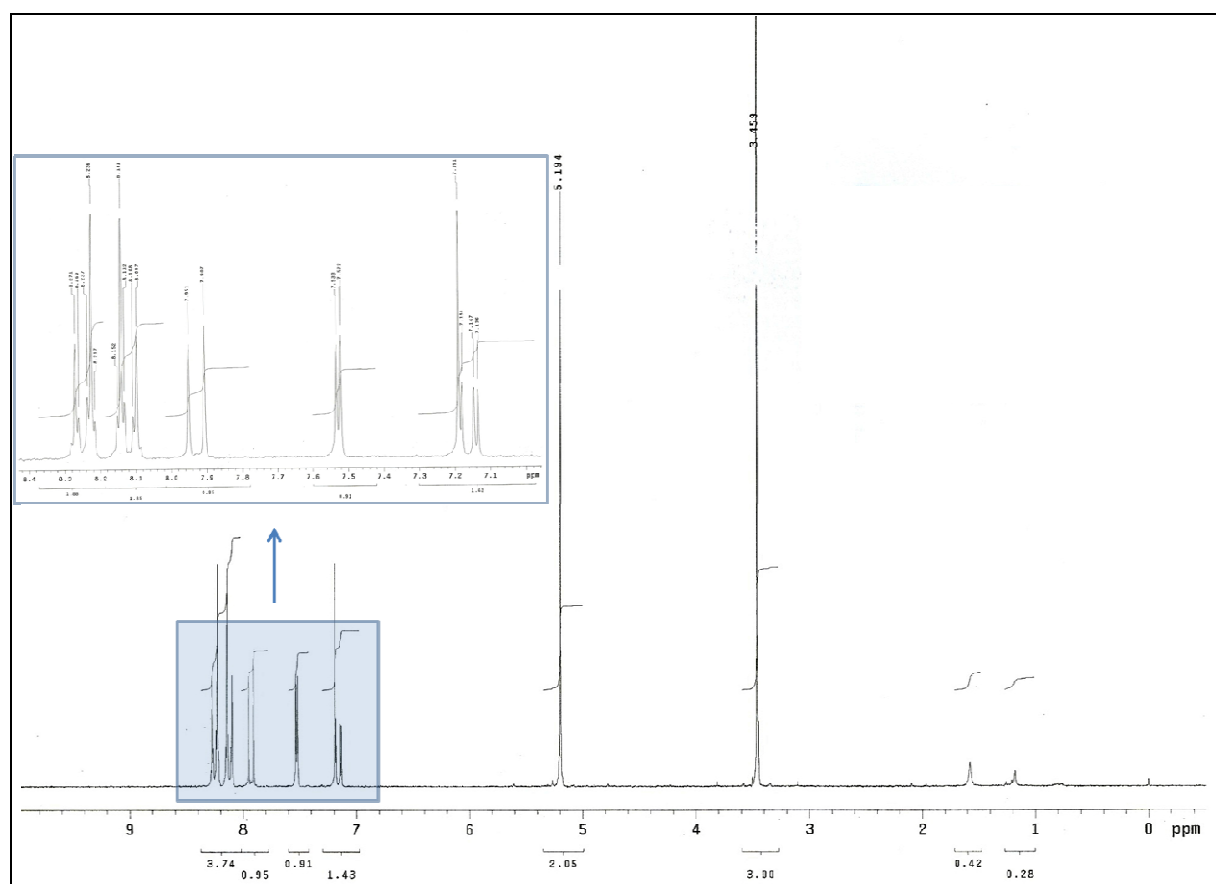



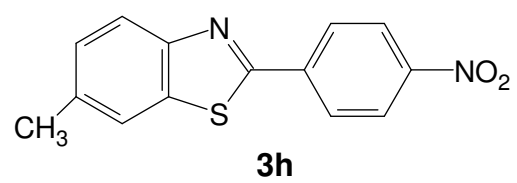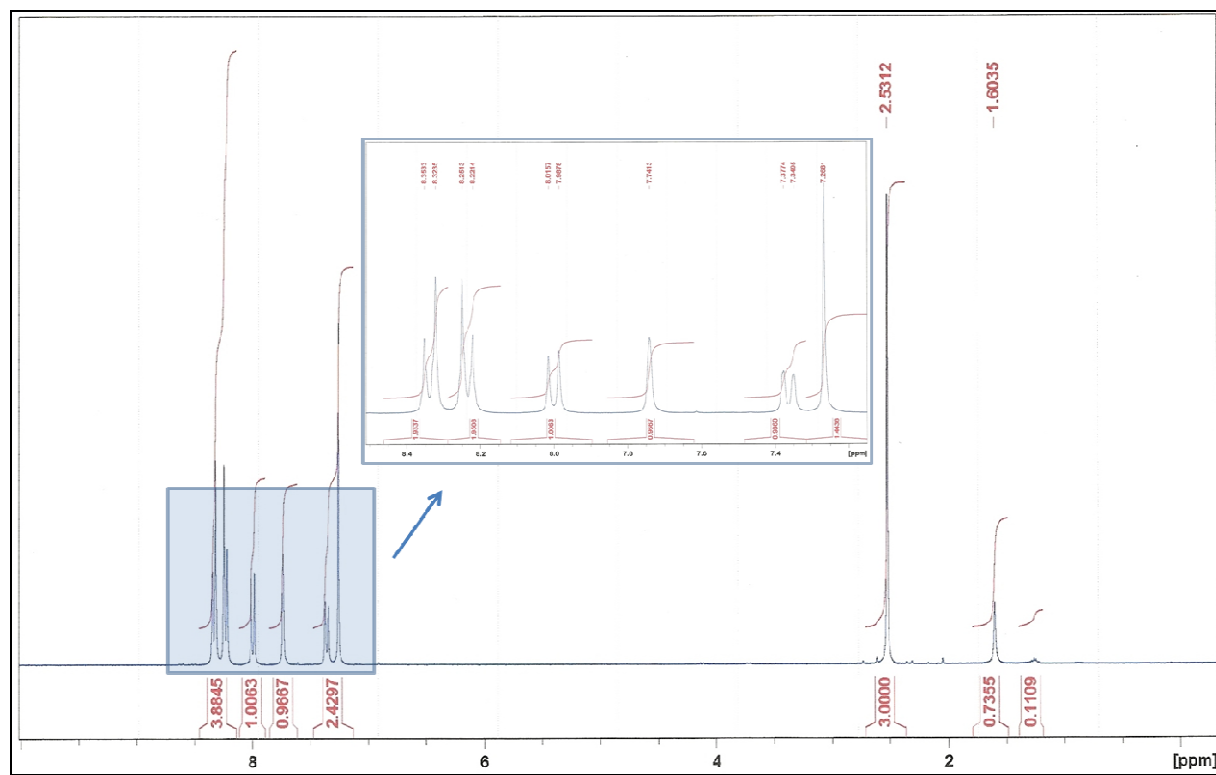

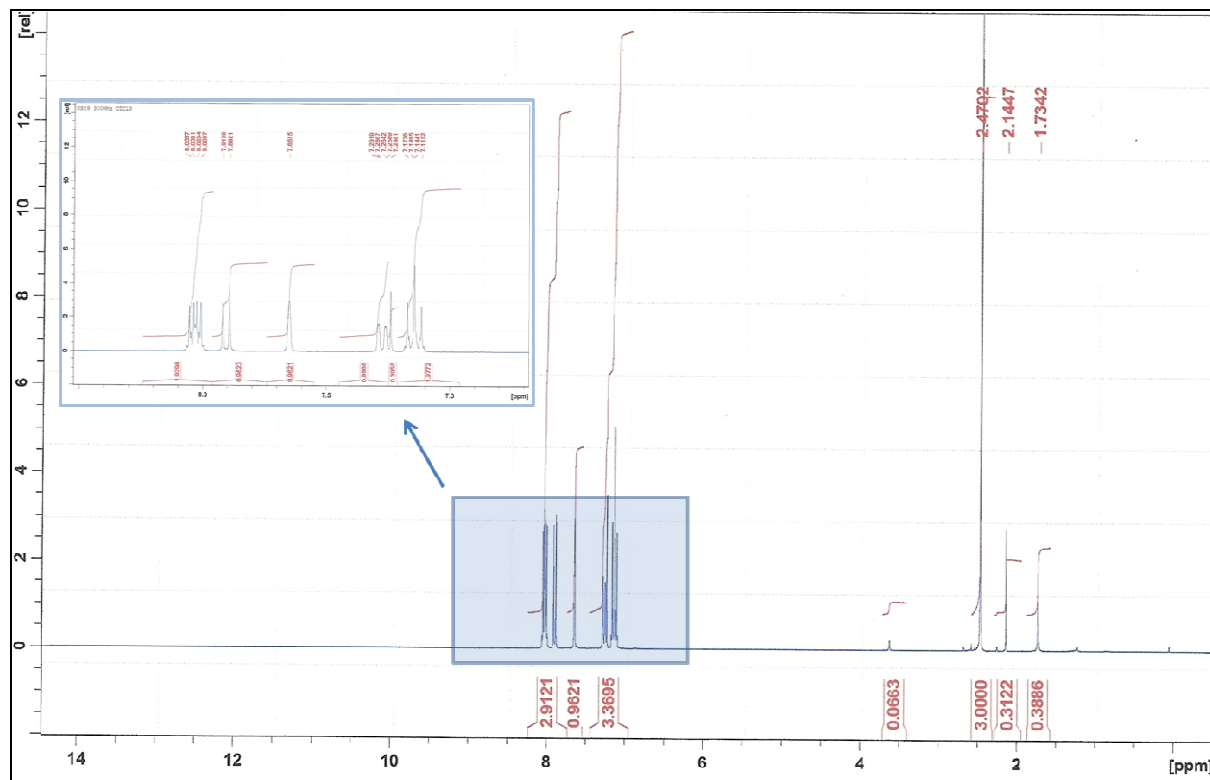

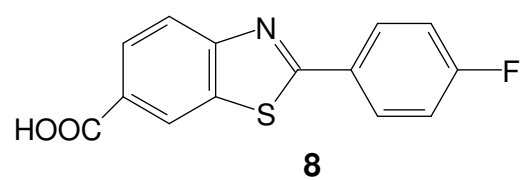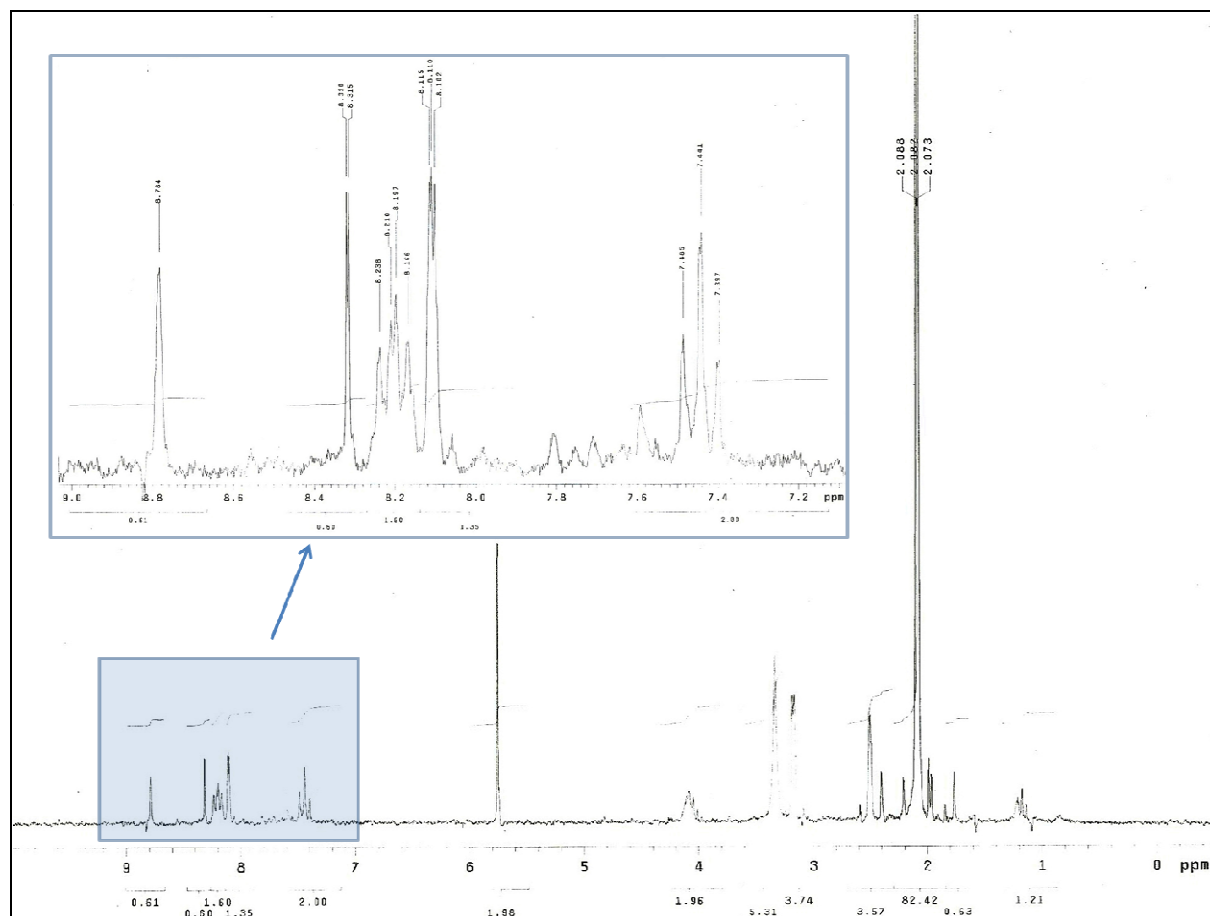

## 5. MS spectra of key target compounds

Exact mass measurement was performed on a time-of-flight mass spectrometer (LCT, Micromass, Manchester, UK) equipped with an orthogonal electrospray ionization interface, operated in positive mode ( $\text{ES}^+$ ). Accurate mass determination was done by coinfusion with a compound with known mass as an internal calibration standard (lock mass).

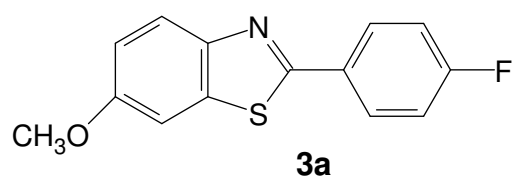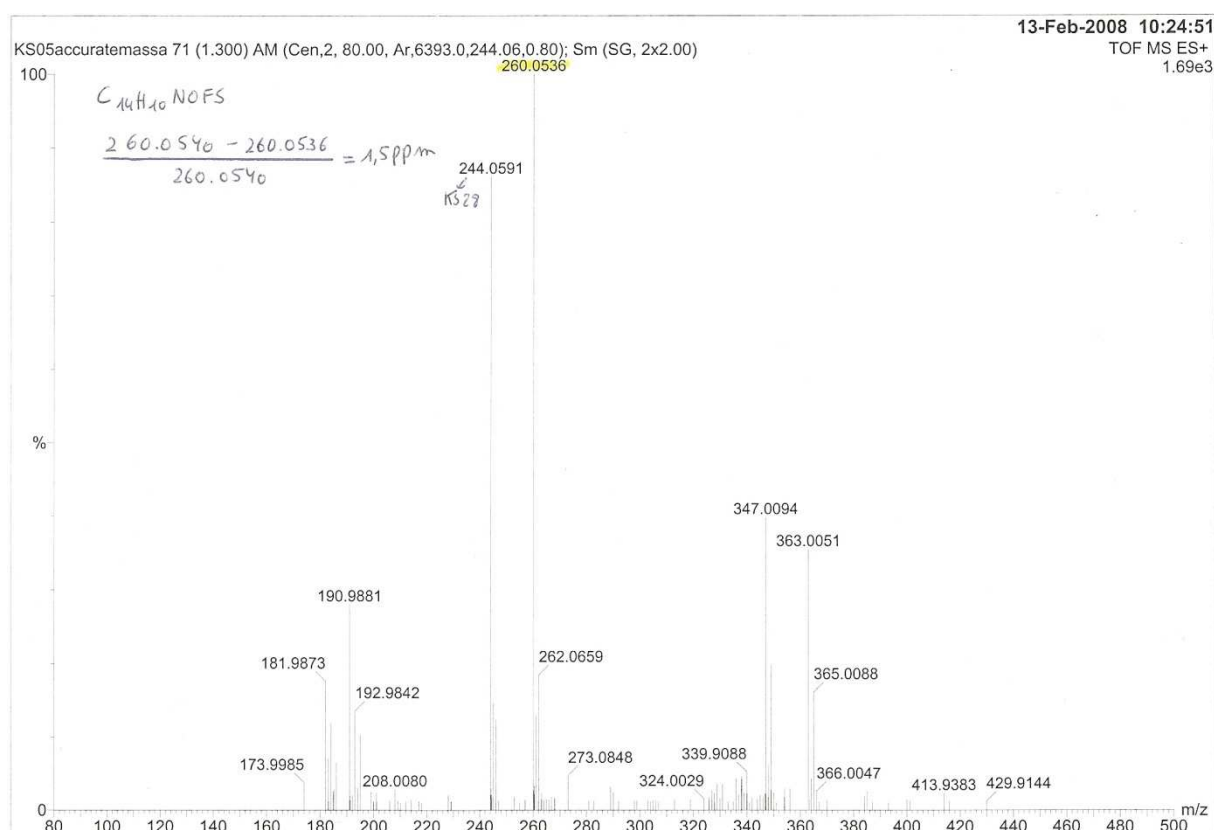

Accurate MS  $\text{ES}^+$   $m/z$   $[\text{M}+\text{H}]^+$  260.0536 (calculated for  $\text{C}_{14}\text{H}_{10}\text{NOFS}$  260.0540). Lock mass:  $\text{C}_{14}\text{H}_{10}\text{FNS}$  244.0591.

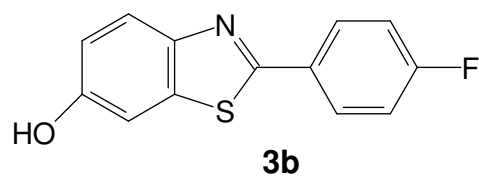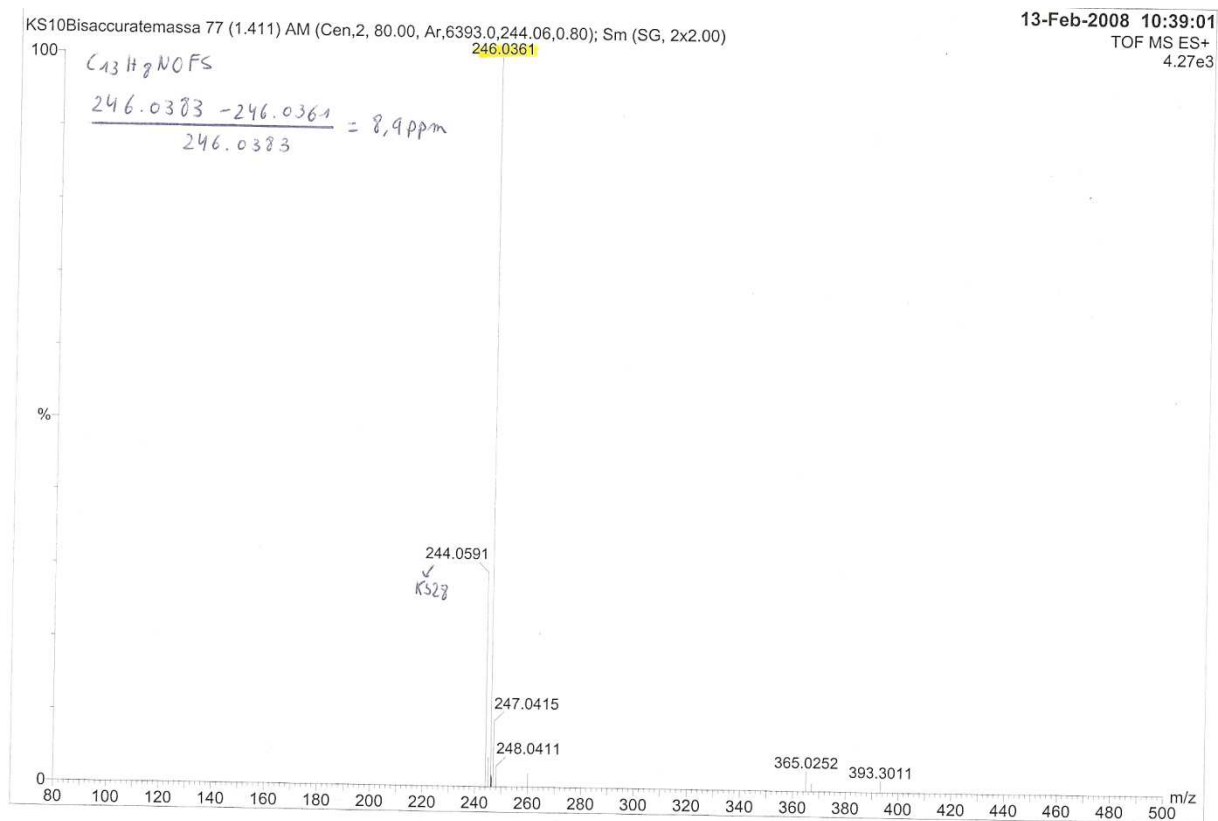

Accurate MS ES<sup>+</sup>  $m/z$  [M+H]<sup>+</sup> 246.0361 (calculated for C<sub>13</sub>H<sub>8</sub>NOFS 246.0383). Lock mass: C<sub>14</sub>H<sub>10</sub>FNS 244.0591.

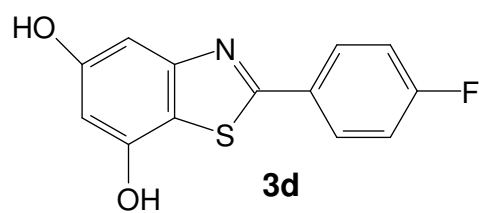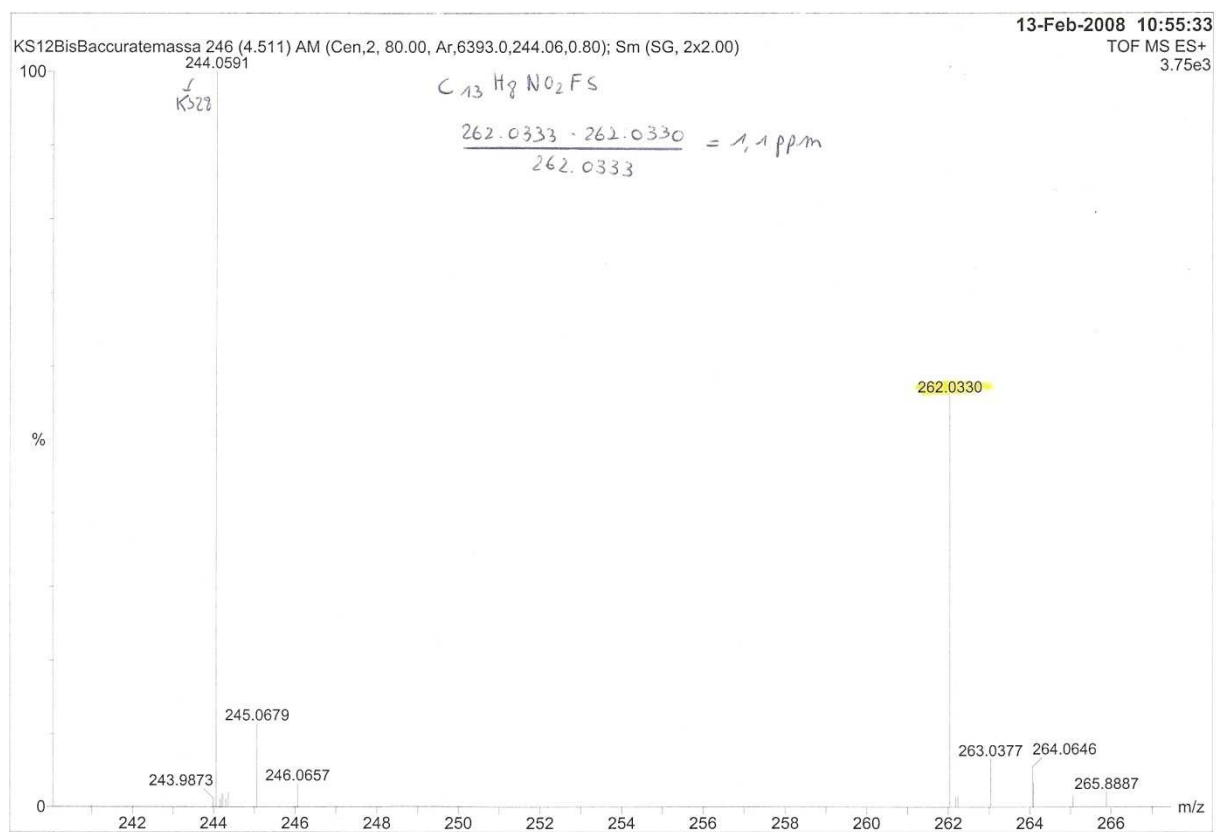

Accurate MS ES<sup>+</sup> m/z [M+H]<sup>+</sup> 262.0330 (calculated for C<sub>13</sub>H<sub>8</sub>NO<sub>2</sub>FS 262.0333). Lock mass: C<sub>14</sub>H<sub>10</sub>FNS 244.0591.

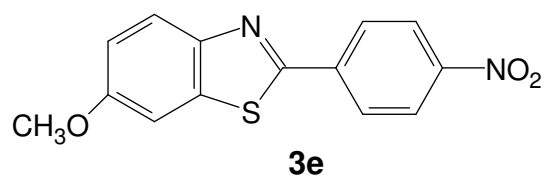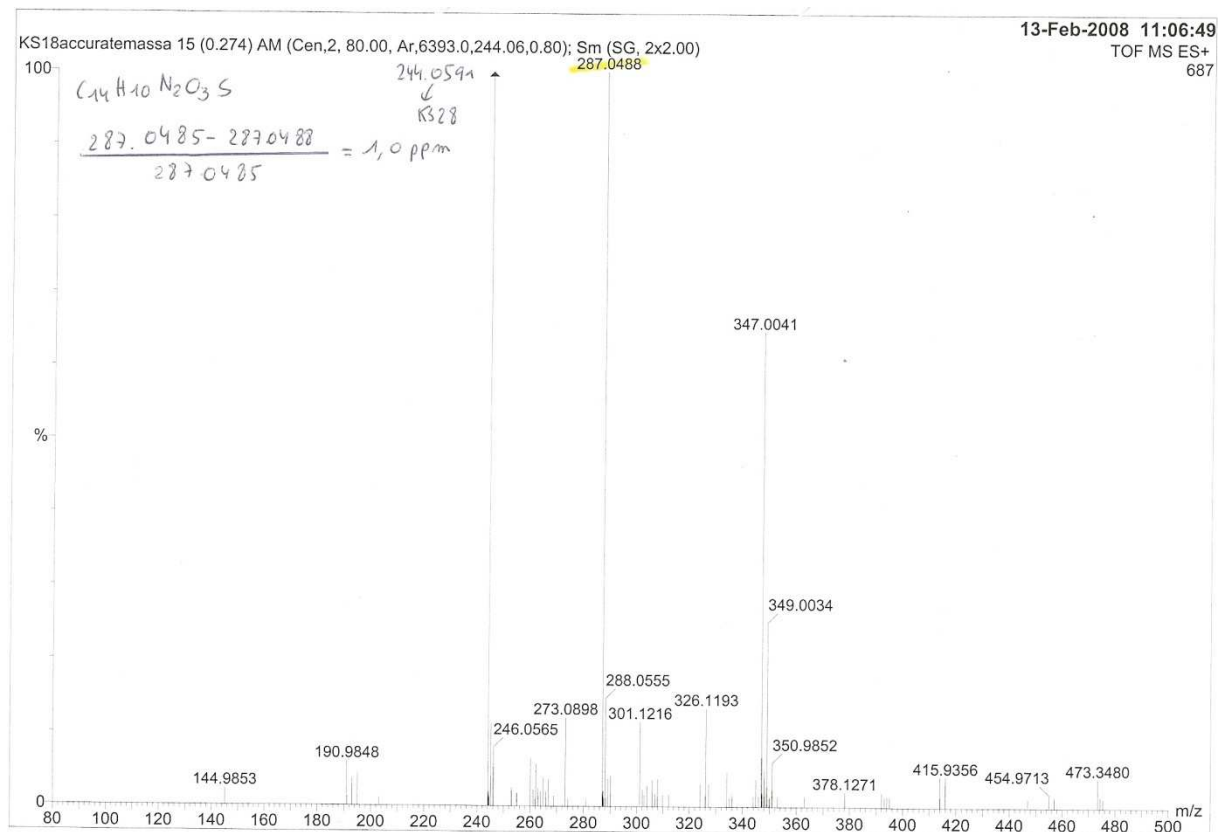

Accurate MS ES<sup>+</sup> m/z [M+H]<sup>+</sup> 287.0488 (calculated for C<sub>14</sub>H<sub>10</sub>N<sub>2</sub>O<sub>3</sub>S 287.0485). Lock mass: C<sub>14</sub>H<sub>10</sub>FNS 244.0591.

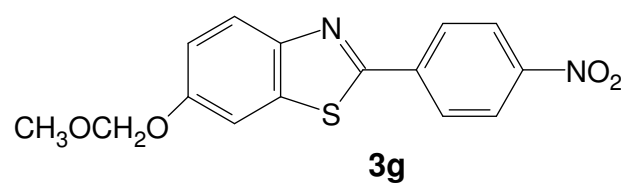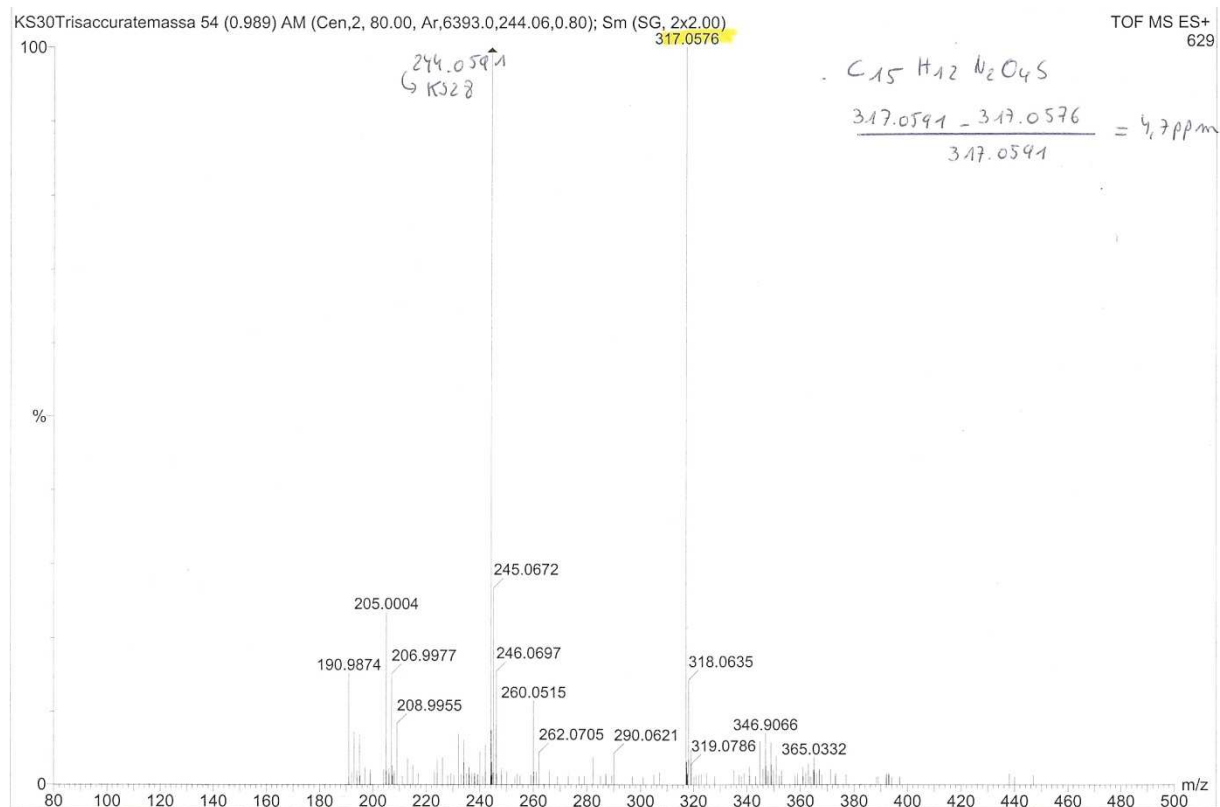

Accurate MS ES<sup>+</sup> m/z [M+H]<sup>+</sup> 317.0576 (calculated for C<sub>15</sub>H<sub>12</sub>N<sub>2</sub>O<sub>4</sub>S 317.0591). Lock mass: C<sub>14</sub>H<sub>10</sub>FNS 244.0591.



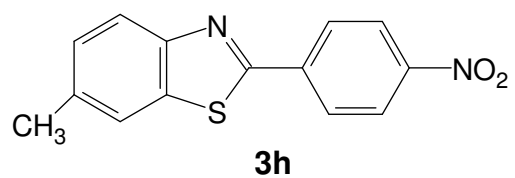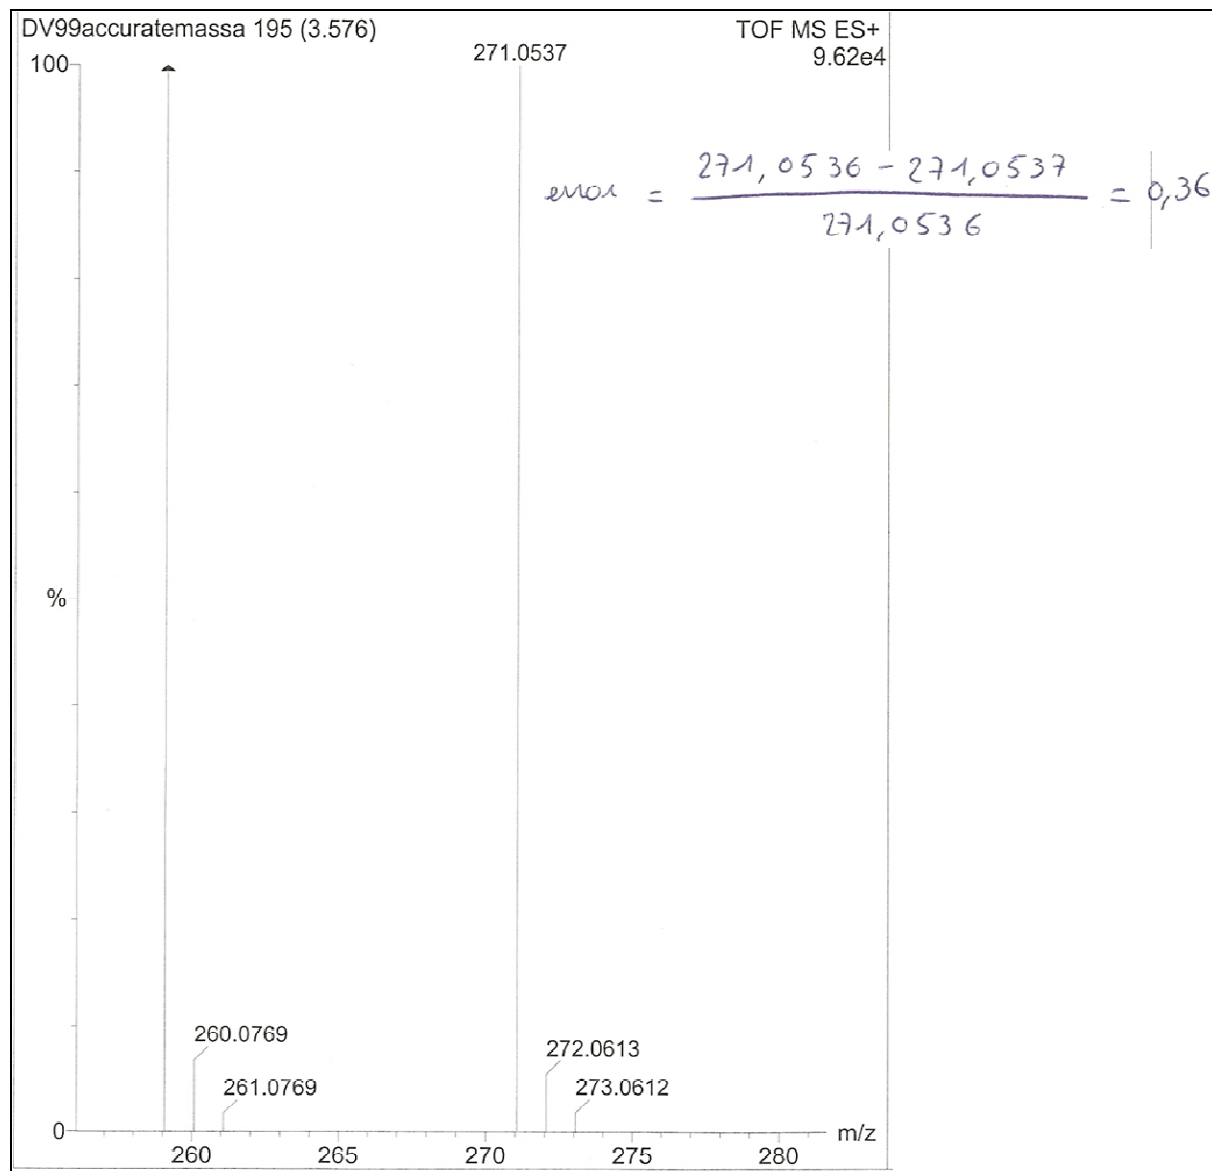

Accurate MS ES<sup>+</sup> m/z [M+H]<sup>+</sup> 271.0537 (calculated for C<sub>14</sub>H<sub>10</sub>N<sub>2</sub>O<sub>2</sub>S 271.0536). Lock mass: C<sub>14</sub>H<sub>11</sub>FN<sub>2</sub>S 259.3271.

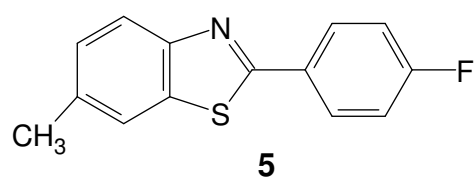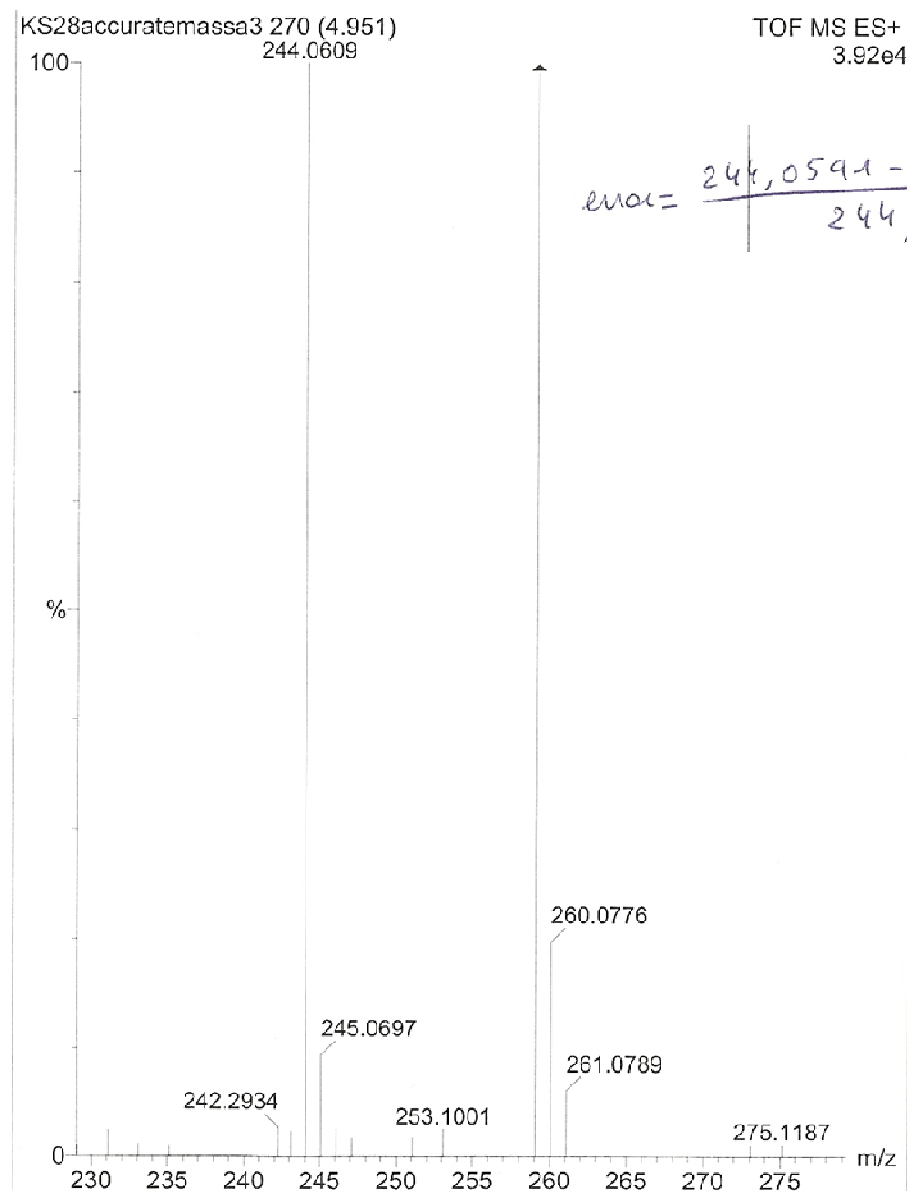

Accurate MS ES<sup>+</sup> m/z [M+H]<sup>+</sup> 244.0498 (calculated for C<sub>14</sub>H<sub>10</sub>FNS 244.0591). Lock mass:  
C<sub>14</sub>H<sub>11</sub>FN<sub>2</sub>S 259.3271.

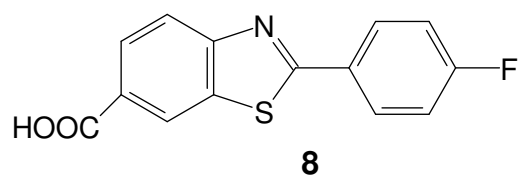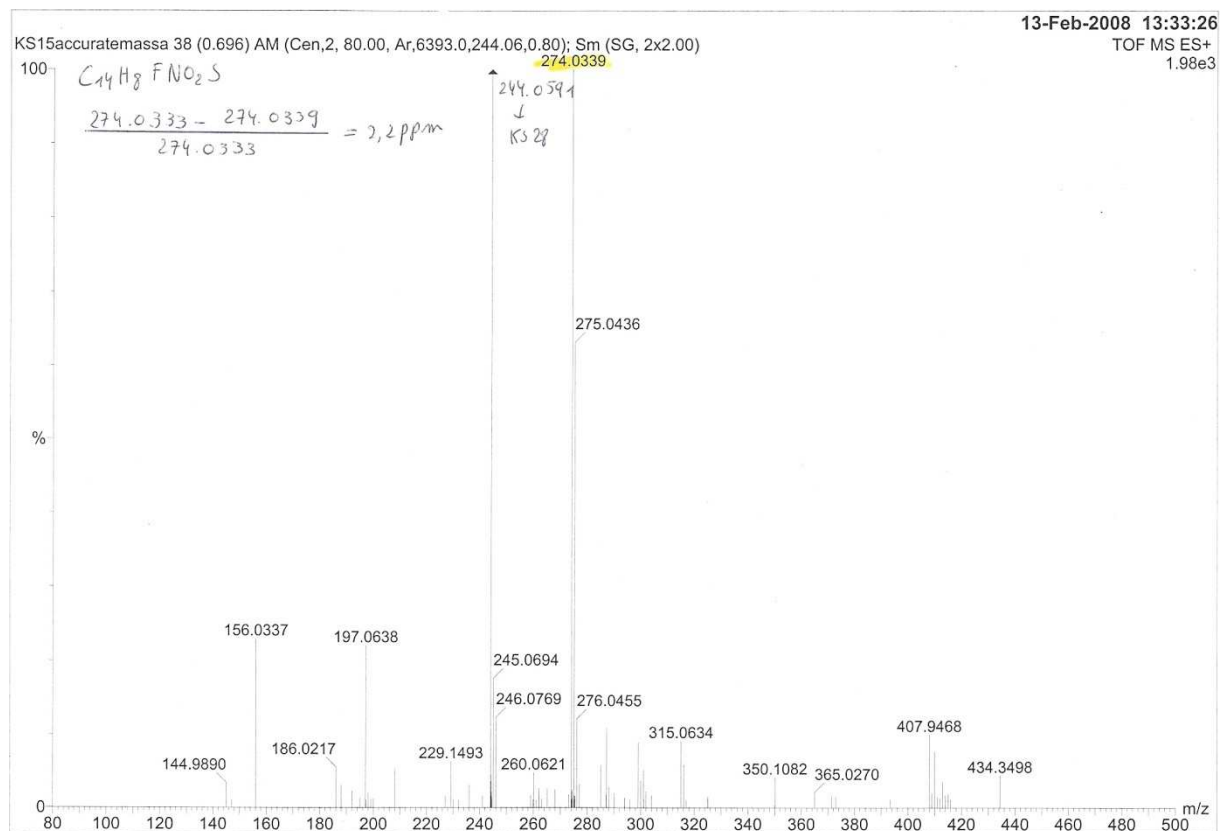

Accurate MS ES<sup>+</sup> m/z [M+H]<sup>+</sup> 274.0339 (calculated for C<sub>14</sub>H<sub>8</sub>FNO<sub>2</sub>S 274.0333). Lock mass: C<sub>14</sub>H<sub>10</sub>FNS 244.0591.
